# Supplementary material for: Sample size estimation using a latent variable model for mixed outcome co-primary, multiple primary and composite endpoints
Source: PubMed Central journal article supplement (PMC7612654; doi:10.1002/sim.9356), 2022-02-23
Supplement: EMS144011-supplement-Supplementary.pdf [file EMS144011-supplement-Supplementary.pdf]

# Sample Size Estimation using a Latent Variable Model for Mixed Outcome Co-Primary, Multiple Primary and Composite Endpoints: Supplementary Material

## 1. COMPOSITE ENDPOINTS

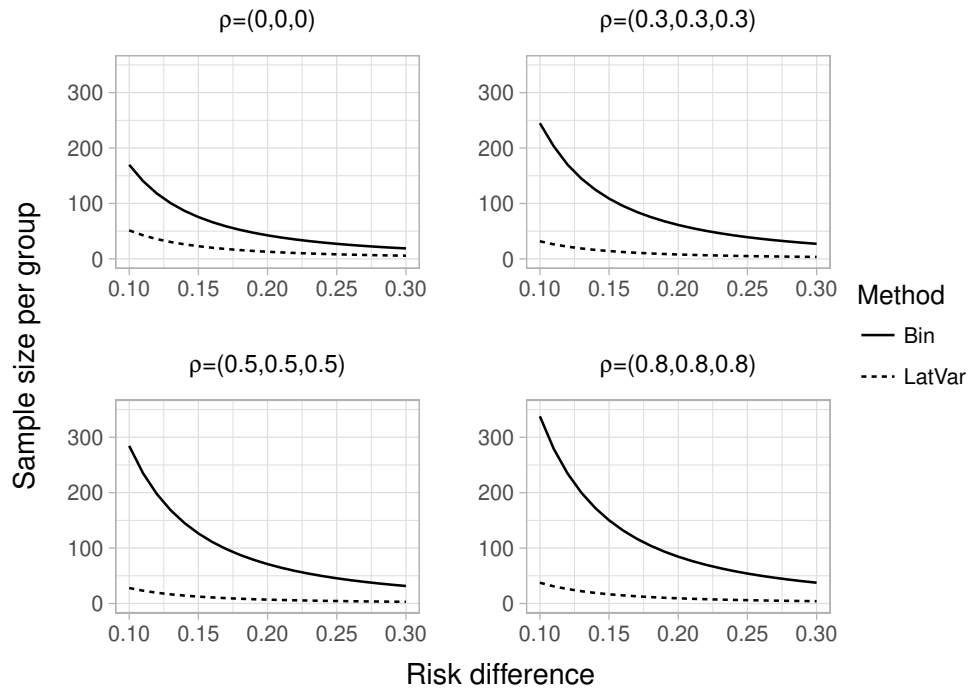

Fig. 1. Estimated sample size per group for different values of the risk difference using the latent variable and standard binary methods when the composite endpoint is formed from one continuous, one ordinal and one binary outcome, where all components drive response and correlations between the outcomes are between 0 and 0.8, where  $\rho = (\rho_{12}, \rho_{13}, \rho_{23})$

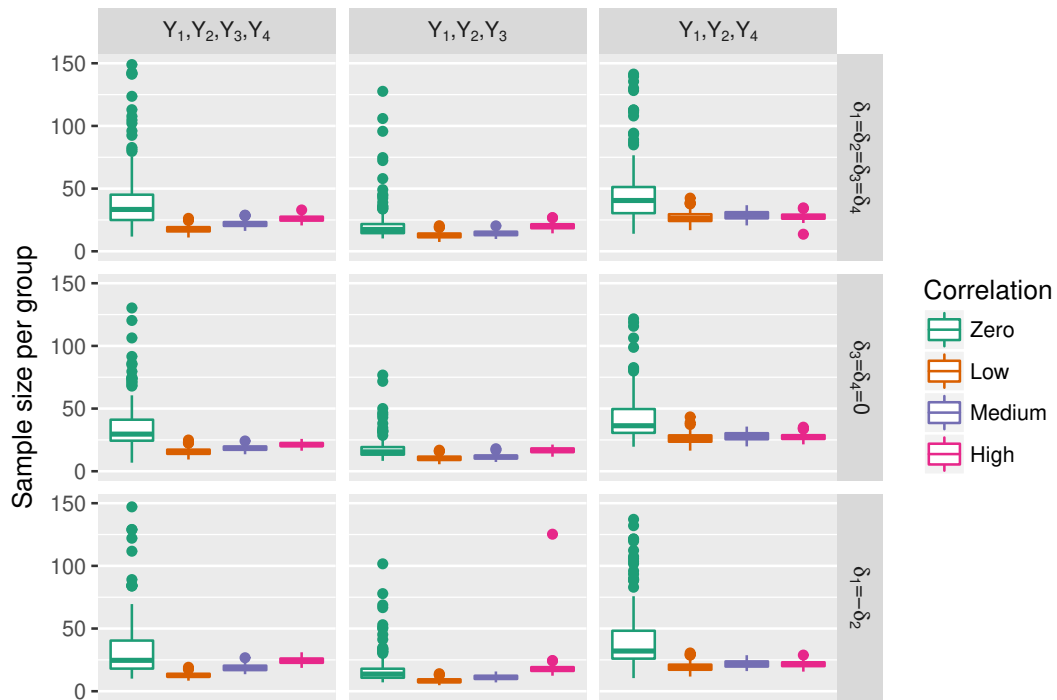

Fig. 2. Boxplots of the estimated sample size per group from 1000 simulated datasets using the latent variable method for composites containing two continuous, one ordinal and one binary component and correlation between endpoints is zero, low=0.3, medium=0.5 or high=0.8. These are shown when response is driven by  $(Y_1, Y_2, Y_3, Y_4)$ ,  $(Y_1, Y_2, Y_3)$  or  $(Y_1, Y_2, Y_4)$  and the treatment effect structure in the components is  $\delta_1 = \delta_2 = \delta_3 = \delta_4$ ,  $\delta_3 = \delta_4 = 0$  or  $\delta_1 = -\delta_2$

Table 1. Median sample sizes  $n = n_C = n_T$  for overall power  $1 - \beta \approx 80\%$ ,  $\alpha = 0.05$ ,  $k_m = 1$ ,  $K = 3$ ,  $\delta = \mu_T - \mu_C$  : overall risk difference on the composite,  $\delta^\dagger$  : treatment effect structure in the components, for a combination of correlations 0, L=0.3, M=0.5, H=0.8 using the latent variable model when the composite is made up of one continuous, one ordinal and one binary outcome

| Response        | $\delta^\dagger$                 | $\delta$ | Correlation ( $\rho_{12}, \rho_{13}, \rho_{23}$ ) |      |      |      |     |     |     |
|-----------------|----------------------------------|----------|---------------------------------------------------|------|------|------|-----|-----|-----|
|                 |                                  |          | 000                                               | 00H  | LLL  | LLH  | MMM | MMH | HHH |
| $Y_1, Y_2, Y_3$ | $\delta_1 = \delta_2 = \delta_3$ | 0.05     | 206                                               | 339  | 128  | 119  | 112 | 108 | 145 |
|                 |                                  | 0.10     | 52                                                | 85   | 32   | 30   | 28  | 27  | 38  |
|                 |                                  | 0.15     | 23                                                | 38   | 15   | 14   | 13  | 12  | 17  |
|                 | $\delta_3 = 0$                   | 0.05     | 201                                               | 334  | 123  | 117  | 105 | 112 | 159 |
|                 |                                  | 0.10     | 51                                                | 84   | 31   | 30   | 27  | 28  | 40  |
|                 |                                  | 0.15     | 23                                                | 38   | 14   | 13   | 12  | 13  | 18  |
|                 | $\delta_2 = \delta_3 = 0$        | 0.05     | 197                                               | 329  | 119  | 114  | 101 | 106 | 121 |
|                 |                                  | 0.10     | 49                                                | 81   | 29   | 29   | 27  | 21  | 30  |
|                 |                                  | 0.15     | 21                                                | 36   | 14   | 13   | 12  | 12  | 15  |
| $Y_1, Y_3$      | $\delta_1 = \delta_2 = \delta_3$ | 0.05     | 474                                               | 494  | 289  | 200  | 267 | 205 | 240 |
|                 |                                  | 0.10     | 119                                               | 124  | 73   | 50   | 67  | 52  | 60  |
|                 |                                  | 0.15     | 53                                                | 55   | 33   | 23   | 30  | 23  | 27  |
|                 | $\delta_3 = 0$                   | 0.05     | 468                                               | 499  | 286  | 195  | 264 | 203 | 248 |
|                 |                                  | 0.10     | 117                                               | 125  | 72   | 49   | 66  | 51  | 62  |
|                 |                                  | 0.15     | 52                                                | 56   | 32   | 22   | 30  | 23  | 28  |
|                 | $\delta_2 = \delta_3 = 0$        | 0.05     | 470                                               | 501  | 287  | 196  | 264 | 204 | 249 |
|                 |                                  | 0.10     | 119                                               | 123  | 73   | 49   | 67  | 51  | 63  |
|                 |                                  | 0.15     | 53                                                | 55   | 32   | 23   | 31  | 24  | 28  |
| $Y_3$           | $\delta_1 = \delta_2 = \delta_3$ | 0.05     | 1493                                              | 1472 | 1250 | 1113 | 948 | 793 | 609 |
|                 |                                  | 0.10     | 374                                               | 368  | 313  | 279  | 237 | 199 | 153 |
|                 |                                  | 0.15     | 166                                               | 164  | 139  | 124  | 106 | 89  | 68  |
|                 | $\delta_3 = 0$                   | 0.05     | 1502                                              | 1468 | 1256 | 1113 | 960 | 806 | 622 |
|                 |                                  | 0.10     | 376                                               | 367  | 315  | 279  | 240 | 202 | 156 |
|                 |                                  | 0.15     | 176                                               | 164  | 140  | 124  | 107 | 90  | 70  |
|                 | $\delta_2 = \delta_3 = 0$        | 0.05     | 1504                                              | 1465 | 1259 | 1115 | 963 | 807 | 624 |
|                 |                                  | 0.10     | 376                                               | 370  | 316  | 280  | 241 | 203 | 156 |
|                 |                                  | 0.15     | 174                                               | 164  | 139  | 126  | 106 | 90  | 70  |

Table 2. Median sample sizes  $n = n_C = n_T$  for overall power  $1 - \beta \approx 80\%$ ,  $\alpha = 0.05$ ,  $k_m = 1$ ,  $K = 3$ ,  $\delta = \mu_T - \mu_C$  : overall risk difference on the composite,  $\delta^\dagger$  : treatment effect structure in the components, for a combination of correlations ranging from 0, L=0.3, M=0.5, H=0.8 using the standard binary method when the composite is made up of one continuous, one ordinal and one binary outcome

| Response        | $\delta^\dagger$                 | $\delta$ | Correlation ( $\rho_{12}, \rho_{13}, \rho_{23}$ ) |      |      |      |      |      |      |
|-----------------|----------------------------------|----------|---------------------------------------------------|------|------|------|------|------|------|
|                 |                                  |          | 000                                               | 00H  | LLL  | LLH  | MMM  | MMH  | HHH  |
| $Y_1, Y_2, Y_3$ | $\delta_1 = \delta_2 = \delta_3$ | 0.05     | 680                                               | 965  | 980  | 1141 | 1138 | 1214 | 1352 |
|                 |                                  | 0.10     | 170                                               | 242  | 245  | 286  | 285  | 304  | 338  |
|                 |                                  | 0.15     | 76                                                | 108  | 109  | 127  | 127  | 135  | 151  |
|                 | $\delta_3 = 0$                   | 0.05     | 628                                               | 939  | 928  | 1098 | 1102 | 1183 | 1332 |
|                 |                                  | 0.10     | 157                                               | 235  | 232  | 275  | 276  | 296  | 333  |
|                 |                                  | 0.15     | 70                                                | 105  | 104  | 122  | 123  | 132  | 148  |
|                 | $\delta_2 = \delta_3 = 0$        | 0.05     | 609                                               | 920  | 914  | 1086 | 1097 | 1171 | 1310 |
|                 |                                  | 0.10     | 147                                               | 231  | 228  | 270  | 271  | 290  | 328  |
|                 |                                  | 0.15     | 68                                                | 101  | 101  | 119  | 121  | 130  | 146  |
| $Y_1, Y_3$      | $\delta_1 = \delta_2 = \delta_3$ | 0.05     | 1127                                              | 1136 | 1255 | 1261 | 1334 | 1320 | 1425 |
|                 |                                  | 0.10     | 282                                               | 284  | 314  | 316  | 334  | 330  | 357  |
|                 |                                  | 0.15     | 126                                               | 127  | 140  | 141  | 149  | 147  | 159  |
|                 | $\delta_3 = 0$                   | 0.05     | 1078                                              | 1072 | 1216 | 1218 | 1298 | 1296 | 1403 |
|                 |                                  | 0.10     | 270                                               | 268  | 304  | 305  | 325  | 324  | 351  |
|                 |                                  | 0.15     | 120                                               | 120  | 136  | 136  | 145  | 144  | 156  |
|                 | $\delta_2 = \delta_3 = 0$        | 0.05     | 1066                                              | 1063 | 1202 | 1209 | 1296 | 1297 | 1403 |
|                 |                                  | 0.10     | 263                                               | 259  | 300  | 299  | 319  | 324  | 351  |
|                 |                                  | 0.15     | 121                                               | 119  | 133  | 131  | 143  | 143  | 156  |
| $Y_3$           | $\delta_1 = \delta_2 = \delta_3$ | 0.05     | 1547                                              | 1548 | 1550 | 1548 | 1550 | 1550 | 1549 |
|                 |                                  | 0.10     | 387                                               | 387  | 388  | 387  | 388  | 388  | 388  |
|                 |                                  | 0.15     | 172                                               | 172  | 173  | 172  | 173  | 173  | 173  |
|                 | $\delta_3 = 0$                   | 0.05     | 1544                                              | 1545 | 1549 | 1548 | 1549 | 1548 | 1545 |
|                 |                                  | 0.10     | 386                                               | 387  | 388  | 387  | 388  | 387  | 387  |
|                 |                                  | 0.15     | 172                                               | 172  | 173  | 172  | 173  | 172  | 172  |
|                 | $\delta_2 = \delta_3 = 0$        | 0.05     | 1544                                              | 1546 | 1549 | 1546 | 1551 | 1549 | 1545 |
|                 |                                  | 0.10     | 386                                               | 389  | 387  | 385  | 388  | 388  | 387  |
|                 |                                  | 0.15     | 173                                               | 172  | 173  | 173  | 172  | 172  | 172  |

Table 3. Median sample sizes per group  $n = n_C = n_T$  for overall power  $1 - \beta \approx 80\%$ ,  $\alpha = 0.05$ ,  $k_m = 2, K = 4$ ,  $\delta = \mu_T - \mu_C$  : overall risk difference on the composite ,  $\delta^\dagger$ : treatment effect structure in the components, for a combination of correlations 0, L=0.3, M=0.5, H=0.8 using the latent variable model when the composite is comprised of two continuous, one ordinal and one binary outcome

| Response             | $\delta^\dagger$                            | $\delta$ | Correlation ( $\rho_{12}, \rho_{13}, \rho_{14}, \rho_{23}, \rho_{24}, \rho_{34}$ ) |        |        |        |
|----------------------|---------------------------------------------|----------|------------------------------------------------------------------------------------|--------|--------|--------|
|                      |                                             |          | 000000                                                                             | LLLLLL | MMMMMM | HHHHHH |
| $Y_1, Y_2, Y_3, Y_4$ | $\delta_1 = \delta_2 = \delta_3 = \delta_4$ | 0.05     | 70                                                                                 | 51     | 41     | 81     |
|                      |                                             | 0.10     | 18                                                                                 | 13     | 11     | 21     |
|                      |                                             | 0.15     | 8                                                                                  | 6      | 5      | 9      |
|                      | $\delta_3 = \delta_4 = 0$                   | 0.05     | 62                                                                                 | 41     | 47     | 67     |
|                      |                                             | 0.10     | 16                                                                                 | 11     | 12     | 17     |
|                      |                                             | 0.15     | 7                                                                                  | 5      | 6      | 8      |
|                      | $\delta_1 = -\delta_2$                      | 0.05     | 55                                                                                 | 34     | 45     | 72     |
|                      |                                             | 0.10     | 14                                                                                 | 9      | 12     | 18     |
|                      |                                             | 0.15     | 7                                                                                  | 4      | 5      | 8      |
| $Y_1, Y_2, Y_3$      | $\delta_1 = \delta_2 = \delta_3 = \delta_4$ | 0.05     | 139                                                                                | 71     | 63     | 105    |
|                      |                                             | 0.10     | 35                                                                                 | 18     | 16     | 27     |
|                      |                                             | 0.15     | 16                                                                                 | 8      | 7      | 12     |
|                      | $\delta_3 = \delta_4 = 0$                   | 0.05     | 120                                                                                | 63     | 75     | 85     |
|                      |                                             | 0.10     | 30                                                                                 | 16     | 19     | 22     |
|                      |                                             | 0.15     | 13                                                                                 | 7      | 9      | 10     |
|                      | $\delta_1 = -\delta_2$                      | 0.05     | 105                                                                                | 50     | 76     | 99     |
|                      |                                             | 0.10     | 27                                                                                 | 13     | 19     | 25     |
|                      |                                             | 0.15     | 12                                                                                 | 6      | 9      | 11     |
| $Y_1, Y_2, Y_4$      | $\delta_1 = \delta_2 = \delta_3 = \delta_4$ | 0.05     | 166                                                                                | 106    | 105    | 112    |
|                      |                                             | 0.10     | 42                                                                                 | 27     | 27     | 28     |
|                      |                                             | 0.15     | 19                                                                                 | 12     | 12     | 13     |
|                      | $\delta_3 = \delta_4 = 0$                   | 0.05     | 147                                                                                | 105    | 113    | 111    |
|                      |                                             | 0.10     | 37                                                                                 | 27     | 29     | 28     |
|                      |                                             | 0.15     | 17                                                                                 | 12     | 13     | 13     |
|                      | $\delta_1 = -\delta_2$                      | 0.05     | 132                                                                                | 78     | 88     | 86     |
|                      |                                             | 0.10     | 33                                                                                 | 20     | 22     | 22     |
|                      |                                             | 0.15     | 15                                                                                 | 9      | 10     | 10     |

Table 4. Median sample sizes per group  $n = n_C = n_T$  for overall power  $1 - \beta \approx 80\%$ ,  $\alpha = 0.05$ ,  $k_m = 2, K = 4$ ,  $\delta = \mu_T - \mu_C$  : overall risk difference on the composite,  $\delta^\dagger$ : treatment effect structure in the components, for a combination of correlations 0, L=0.3, M=0.5, H=0.8 using the standard binary method when the composite is comprised of two continuous, one ordinal and one binary outcome

| Response             | $\delta^\dagger$                            | $\delta$ | Correlation ( $\rho_{12}, \rho_{13}, \rho_{14}, \rho_{23}, \rho_{24}, \rho_{34}$ ) |        |        |        |
|----------------------|---------------------------------------------|----------|------------------------------------------------------------------------------------|--------|--------|--------|
|                      |                                             |          | 000000                                                                             | LLLLLL | MMMMMM | HHHHHH |
| $Y_1, Y_2, Y_3, Y_4$ | $\delta_1 = \delta_2 = \delta_3 = \delta_4$ | 0.05     | 386                                                                                | 739    | 665    | 1240   |
|                      |                                             | 0.10     | 97                                                                                 | 185    | 167    | 310    |
|                      |                                             | 0.15     | 43                                                                                 | 83     | 74     | 138    |
|                      | $\delta_3 = \delta_4 = 0$                   | 0.05     | 324                                                                                | 665    | 867    | 1205   |
|                      |                                             | 0.10     | 81                                                                                 | 167    | 217    | 302    |
|                      |                                             | 0.15     | 36                                                                                 | 74     | 97     | 134    |
|                      | $\delta_1 = -\delta_2$                      | 0.05     | 331                                                                                | 666    | 858    | 1169   |
|                      |                                             | 0.10     | 83                                                                                 | 167    | 215    | 293    |
|                      |                                             | 0.15     | 37                                                                                 | 74     | 96     | 130    |
| $Y_1, Y_2, Y_3$      | $\delta_1 = \delta_2 = \delta_3 = \delta_4$ | 0.05     | 690                                                                                | 956    | 912    | 1300   |
|                      |                                             | 0.10     | 173                                                                                | 239    | 228    | 325    |
|                      |                                             | 0.15     | 77                                                                                 | 107    | 102    | 145    |
|                      | $\delta_3 = \delta_4 = 0$                   | 0.05     | 650                                                                                | 912    | 1053   | 1283   |
|                      |                                             | 0.10     | 163                                                                                | 228    | 264    | 321    |
|                      |                                             | 0.15     | 73                                                                                 | 102    | 117    | 143    |
|                      | $\delta_1 = -\delta_2$                      | 0.05     | 605                                                                                | 866    | 1017   | 1232   |
|                      |                                             | 0.10     | 152                                                                                | 217    | 255    | 308    |
|                      |                                             | 0.15     | 68                                                                                 | 97     | 113    | 137    |
| $Y_1, Y_2, Y_4$      | $\delta_1 = \delta_2 = \delta_3 = \delta_4$ | 0.05     | 690                                                                                | 962    | 919    | 1298   |
|                      |                                             | 0.10     | 173                                                                                | 241    | 230    | 325    |
|                      |                                             | 0.15     | 77                                                                                 | 107    | 103    | 145    |
|                      | $\delta_3 = \delta_4 = 0$                   | 0.05     | 642                                                                                | 919    | 1058   | 1281   |
|                      |                                             | 0.10     | 161                                                                                | 230    | 265    | 321    |
|                      |                                             | 0.15     | 72                                                                                 | 103    | 118    | 143    |
|                      | $\delta_1 = -\delta_2$                      | 0.05     | 610                                                                                | 876    | 1007   | 1225   |
|                      |                                             | 0.10     | 153                                                                                | 219    | 252    | 307    |
|                      |                                             | 0.15     | 68                                                                                 | 98     | 112    | 137    |
